# Supplementary material for: Complementation of a mutation in CpSRP43 causing partial truncation of light-harvesting chlorophyll antenna in Chlorella vulgaris
Source: PubMed Central journal article supplement (PMC5738337; doi:10.1038/s41598-017-18221-0), 2017-12-20
Supplement: 41598_2017_18221_MOESM1_ESM.pdf [file 41598_2017_18221_MOESM1_ESM.pdf]

1 **Complementation of a mutation in *CpSRP43* causing the partial truncation of light-harvesting**  
2 **chlorophyll antenna in *Chlorella vulgaris***

3

4 Won-Sub Shin<sup>1,2</sup>, Bongsoo Lee<sup>1,2</sup>, Nam Kyu Kang<sup>1,2</sup>, Young-Uk Kim<sup>3</sup>, Won-Joong Jeong<sup>3</sup>, Jong-Hee  
5 Kwon<sup>4</sup>, Byeong-ryool Jeong<sup>1,2\*</sup>, Yong Keun Chang<sup>1,2\*</sup>

6

7 <sup>1</sup>Advanced Biomass R&D Center (ABC), Korea Advanced Institute of Science and Technology (KAIST),  
8 Daejeon 34141, Republic of Korea

9 <sup>2</sup>Department of Chemical and Biomolecular Engineering, Korea Advanced Institute of Science and  
10 Technology (KAIST), Daejeon 34141, Republic of Korea

11 <sup>3</sup>Plant Systems Engineering Research Center, Korea Research Institute of Bioscience and Biotechnology  
12 (KRIBB), 125 Gwahak-ro, Yuseong-gu, Daejeon 34141, Republic of Korea

13 <sup>4</sup>Department of Food Science and Technology, Institute of Agriculture and Life Science, Gyeongsang  
14 National University, Jinju 660-701, Republic of Korea

15

16

17 \*Correspondence and requests for materials should be addressed to B.-r.J. (email: bjeong@kaist.ac.kr) or  
18 Y.K.C. (email: changyk@kaist.ac.kr)

19

20

21 **Table S1.** List of primers used in this study

| Primer name      | Primer sequence (5' to 3')                            |
|------------------|-------------------------------------------------------|
| SRP43_Gibson_fwd | CGCTTCTGTCACCTGCAACCATGGCGTCGGCAACCT                  |
| SRP43_Gibson_rev | TCACTTGTCGTCGTCGTCCCTTGTAGTCCGATGGCGAGCCTTGCA         |
| pUC19_fwd        | GACTACAAGGACGACGACGACAAGTGAGAGCTCGAATTTCCCG<br>ATCGTT |
| pUC19_rev        | GTGCAGGTTGCCGACGCCATGGTTGCAGGTGACAGAAGCG              |
| Aph_Gibson_fwd   | TAGATCGGGAATTCACTGGCTTCTTGGCTATGACTTC                 |
| Aph_Gibson_rev   | CACGACGTTGTAAAACGACGGAAAGAGGCCAAAATCAACG              |
| Aph-pUC_back_fwd | CGTTGATTTTGGCCTCTTTCCGTCGTTTTACAACGTCGTG              |
| Aph-pUC_back_rev | GAAGTGTCATAGCGCAAGAAGCCAGTGAATTTCCCGATCTA             |
| S4_F             | CGACTGCTGGTTACTCCACT                                  |
| S4_R             | AGTCTCCTCGTCTCCCTTCTT                                 |
| SRP43_F1         | CAGAGGTGGCGGATCTGAAG                                  |
| SRP43_R1         | GTCTCCCTTCTTCACGGCTC                                  |
| 18S_F1           | ACTTACGAATCGCATGGCCT                                  |
| 18S_R1           | GACTTGCCCTCCAATTGATCC                                 |
| 18S_F2           | GAGTATGGTCGCAAGGCTGA                                  |
| 18S_R2           | ACCCACCAACTAAGAACGGC                                  |

22

23

24 **Table S2.** Assessment of genomic sequence qualities and identification of polymorphic single nucleotide  
25 polymorphism (SNP) loci

| # of CDS gene | # of CDS gene comparable to reference | # of CDS gene including SNP | # of SNP detected in CDS gene | # of polymorphic SNP loci between WT and E5 | # of polymorphic SNP loci in CDS |
|---------------|---------------------------------------|-----------------------------|-------------------------------|---------------------------------------------|----------------------------------|
| 9,427         | 9,016                                 | 212                         | 533                           | 63                                          | 20                               |

26

**Table S3.** Annotations of SNPs of WT and E5 in the coding sequence

| WT amino acid change  | Ref vs WT | E5 amino acid change | Ref vs E5 | BLAST Search |              |                |                                                                                           |
|-----------------------|-----------|----------------------|-----------|--------------|--------------|----------------|-------------------------------------------------------------------------------------------|
|                       |           |                      |           | E-value      | Identity (%) | Accession      | Gene description (Organism name; Gene ID)                                                 |
| GTG(V)->GTG(V)        | SYN       | GTG(V)->GAG(E)       | NONSYN    | 9.00E-04     | 56.82        | AGC59877.1     | chloroplast SRP43 ( <i>Chlamydomonas reinhardtii</i> )                                    |
| TGG(W)->TGG(W)        | SYN       | TGG(W)->TTG(L)       | NONSYN    | 2.00E-05     | 75           | XP_008457400.1 | PREDICTED: LOW QUALITY PROTEIN: helicase SKI2W ( <i>Cucumis melo</i> )                    |
| AGG(R)->AGG(R)        | SYN       | AGG(R)->AAG(K)       | NONSYN    | 0.7          | 37.93        | XP_010062894.1 | PREDICTED: uncharacterized protein LOC104450151 ( <i>Eucalyptus grandis</i> )             |
| AGC(S)->AGC(S)        | SYN       | AGC(S)->AAC(N)       | NONSYN    | 3.2          | 43.18        | KFY86180.1     | hypothetical protein ( <i>Pseudogymnoascus pannorum</i> VKM F-4518 (FW-2643); V500_07812) |
| AGA(R)->AGA(R)        | SYN       | AGA(R)->AAA(K)       | NONSYN    |              |              |                |                                                                                           |
| ACT(T)->ACT(T)        | SYN       | ACT(T)->ATT(I)       | NONSYN    | 5.2          | 31.34        | XP_007303555.1 | hypothetical protein ( <i>Stereum hirsutum</i> FP-91666 SS1; STEHIDRAFT_110529)           |
| CGG(R)->CGG(R)        | SYN       | CGG(R)->TGG(W)       | NONSYN    |              |              |                |                                                                                           |
| GTG(V)->GTG(V)        | SYN       | GTG(V)->GTA(V)       | SYN       |              |              |                |                                                                                           |
| CTG(L)->CTG(L)/CTA(L) | SYN       | CTG(L)->CTG(L)       | SYN       | 4            | 33.33        | KFA80735.1     | hypothetical protein ( <i>Stachybotrys chartarum</i> IBT 40288; S40288_11671)             |
| CTG(L)->CTG(L)        | SYN       | CTG(L)->CTA(L)       | SYN       | 1.00E-10     | 81.08        | XP_013906390.1 | Ubiquitin and WLM domain-containing protein ( <i>Monoraphidium neglectum</i> )            |
| CTC(L)->CTC(L)        | SYN       | CTC(L)->CTT(L)       | SYN       |              |              |                |                                                                                           |
| CGC(R)->CGT(R)        | SYN       | CGC(R)->CGC(R)       | SYN       | 3.00E-04     | 58.33        | XP_005849359.1 | expressed protein ( <i>Chlorella variabilis</i> )                                         |
| AAG(K)->AAA(K)        | SYN       | AAG(K)->AAG(K)       | SYN       |              |              |                |                                                                                           |
| AAC(N)->AAC(N)        | SYN       | AAC(N)->AAT(N)       | SYN       | 1.4          | 26.05        | KIO21807.1     | hypothetical protein ( <i>Tulasnella calospora</i> MUT 4182; M407DRAFT_28620)             |
| TCG(S)->TCG(S)/TTG(L) | NONSYN    | TCG(S)->TCG(S)       | SYN       | 2.00E-62     | 62.43        | XP_013898255.1 | B12-dependent methionine synthase ( <i>Monoraphidium neglectum</i> )                      |
| CGC(R)->TGC(C)        | NONSYN    | CGC(R)->CGC(R)       | SYN       | 3.00E-26     | 35.82        | BAB18104.1     | cyclic nucleotide dependent protein kinase ( <i>Chlamydomonas reinhardtii</i> )           |
| CGC(R)->CAC(H)        | NONSYN    | CGC(R)->CGC(R)       | SYN       | 9.00E-19     | 67.24        | XP_011401820.1 | Zinc finger protein ( <i>Auxenochlorella protothecoides</i> )                             |
| CAG(Q)->TAG(*)        | NONSYN    | CAG(Q)->CAG(Q)       | SYN       | 0.57         | 45.45        | XP_002339873.1 | Pfs, NACHT and WD domain protein ( <i>Talaromyces stipitatus</i> ATCC 10500)              |
| TCT(S)->TTT(F)        | NONSYN    | TCT(S)->TCT(S)       | SYN       | 3.00E-08     | 65.96        | XP_011399816.1 | Desiccation-related protein PCC13-62 ( <i>Auxenochlorella protothecoides</i> )            |
| CTA(L)->CAA(Q)/CTA(L) | NONSYN    | CTA(L)->CAA(Q)       | NONSYN    | 3.00E-77     | 63.13        | XP_013898255.1 | B12-dependent methionine synthase ( <i>Monoraphidium neglectum</i> )                      |

Abbreviations: SYN: Synonymous; NONSYN: Nonsynonymous

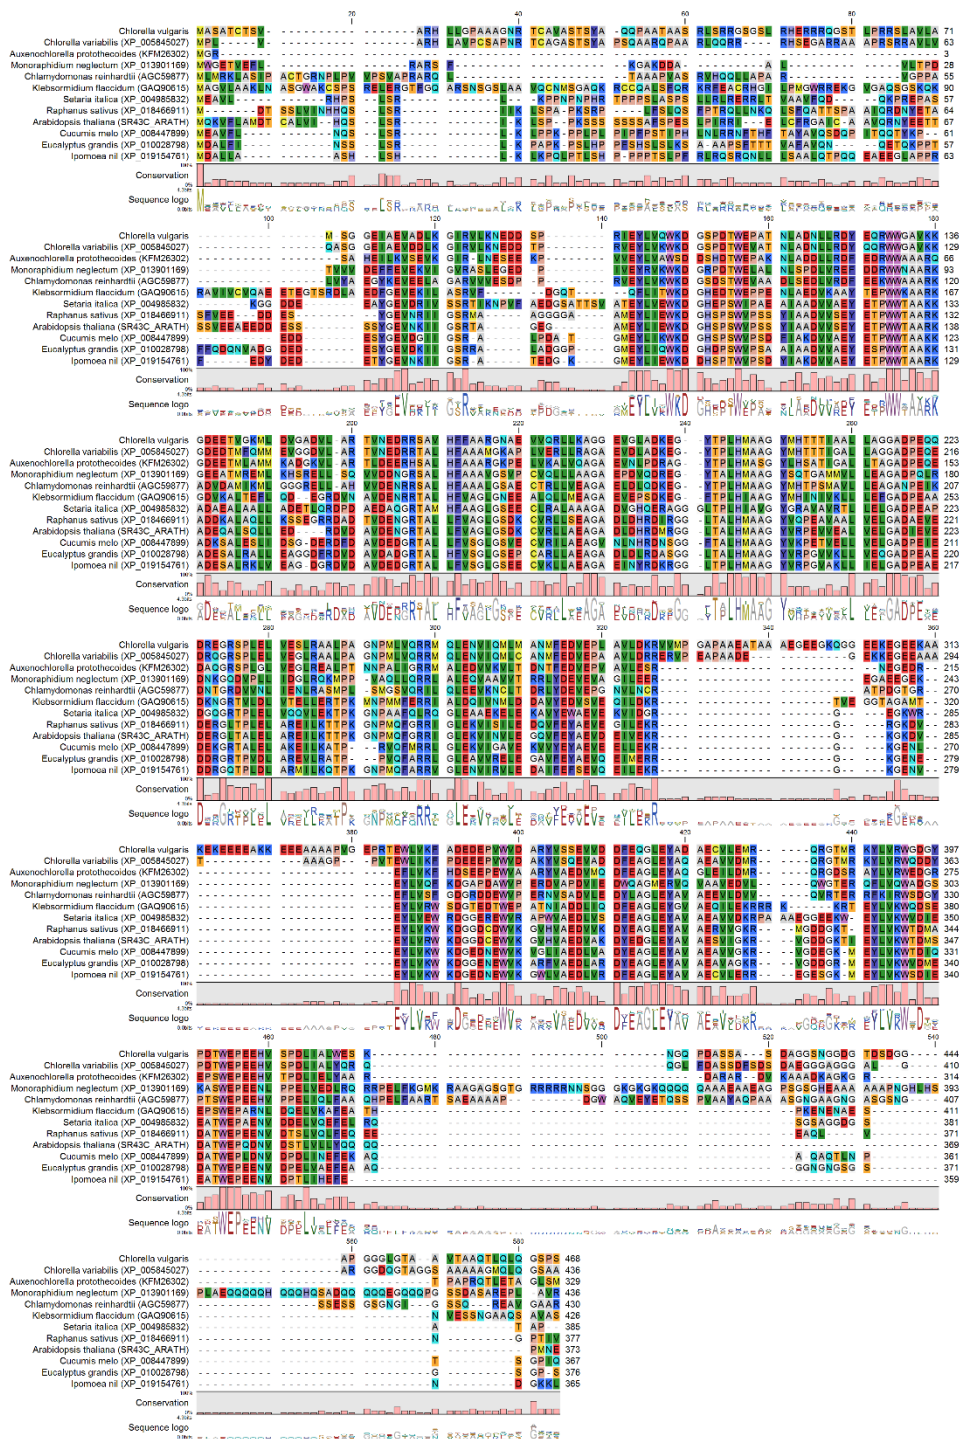

29 **Fig. S1. Alignments of CpSRP43 homologs from plants and microalgae.** The protein sequences were  
 30 downloaded from NCBI (<https://www.ncbi.nlm.nih.gov/>). Background colors of amino acid and  
 31 conserved sequence logo were determined according to Rasmol color scheme  
 32 (<http://www.openrasmol.org/doc/rasmol.html>).

33

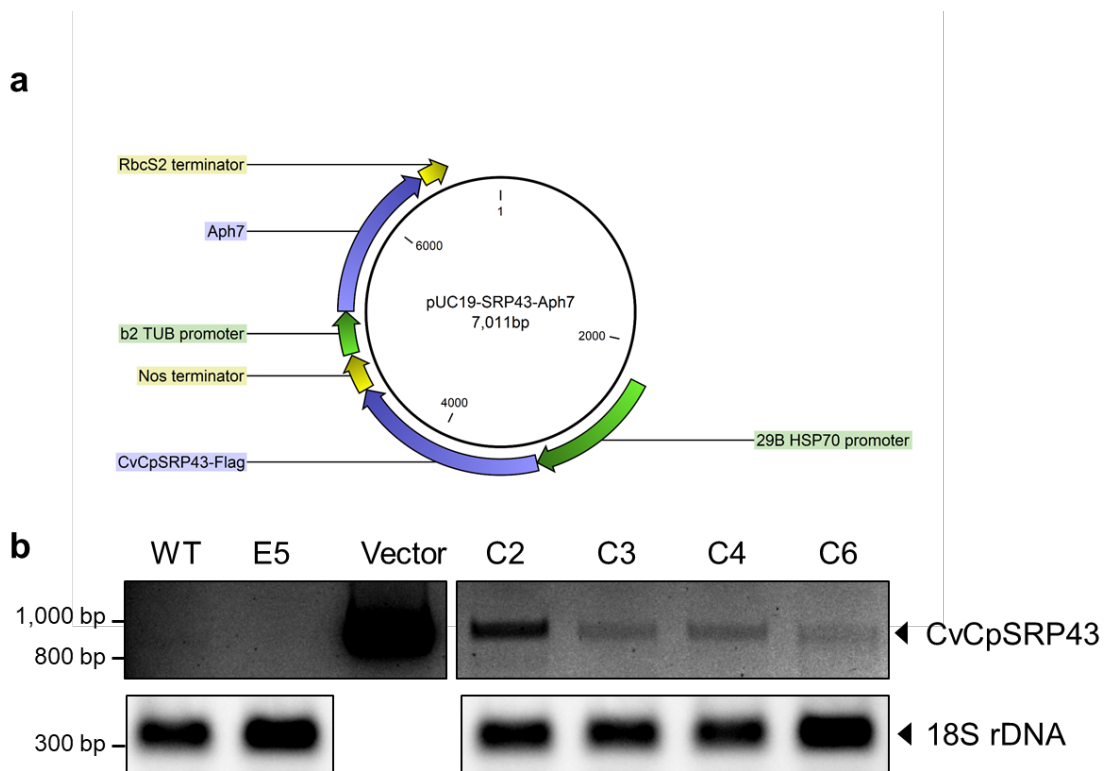

34

35 **Fig. S2. Vector map and confirmation of vector transformation.** (a) Vector used for complementation  
 36 test of *C. vulgaris* E5, including coding sequence of the *CpSRP43* gene of *C. vulgaris* (CvCpSRP43). (b)  
 37 Confirmation of vector transformation into the complemented strains (C2, C3, C4 and C6) by PCR. The  
 38 amplification target size was 938 bp (upper) which includes both 29B HSP70 promoter and CvCpSRP43-  
 39 Flag regions. 18S rDNA bands were detected as a control, and the amplification target size was 303 bp  
 40 (lower). Images were cropped for better comparison.

41

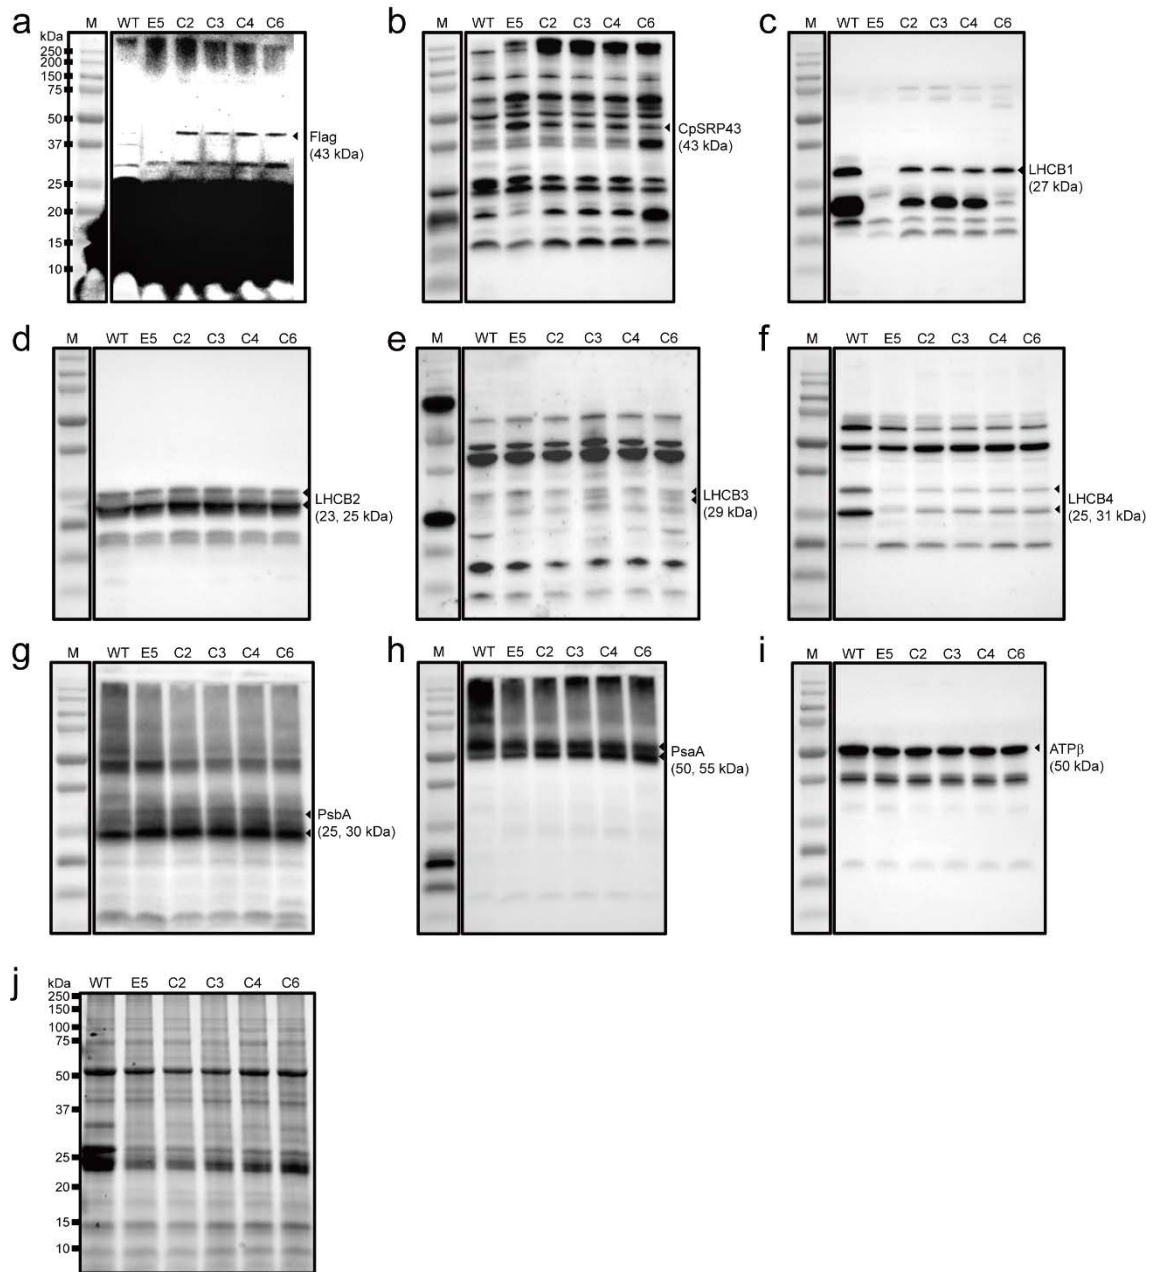

42

43 **Fig. S3. Full-length gel and western blot images.** Proteins were detected with (a) anti-Flag tag, (b) anti-  
 44 CpSRP43, (c) anti-LHCB1, (d) anti-LHCB2, (e) anti-LHCB3, (f) anti-LHCB4, (g) anti-PSBA, (h), anti-  
 45 PSAA and (i) anti-AtpB. Gel image of whole proteins before western blot was pictured by the ChemiDoc  
 46 system (Bio-Rad, USA), which showed bands near 25kDa that might represent antenna proteins (j).  
 47 Arrowheads indicate expected bands with predicted sizes. In several blots with multiple bands, slightly  
 48 lower bands near expected bands were considered as degraded products and also marked as target  
 49 proteins. Prestained markers (M) were imaged separately and combined with the blot images.

50

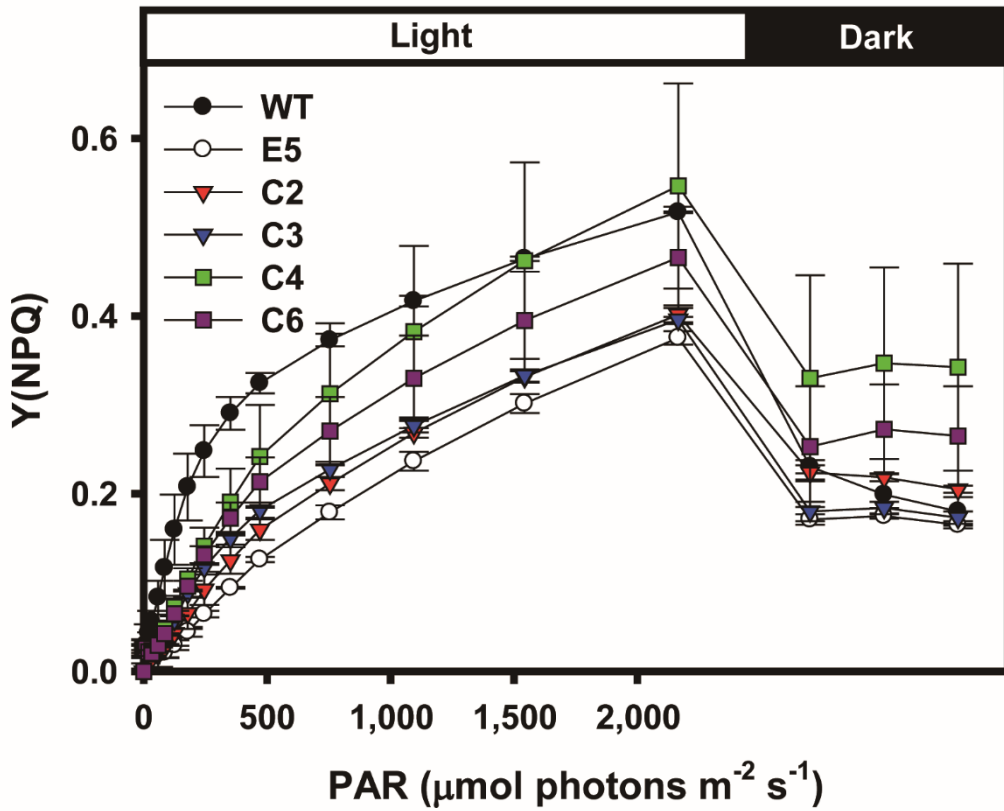

51

52 **Fig. S4. Effect of complementation on non-photochemical quenching.** Light-dependent curves of

53 quantum yields of the non-photochemical quenching (Y(NPQ)) of wild type, E5 and complemented

54 strains (C2, C3, C4 and C6). The white bar at the top of the figure indicates the illumination period with

55 an increase in the actinic light, and the dark bar indicates the dark recovery after illumination. The step

56 width of each data point was 2min. The data represent the average of samples and the error bars indicate

57 the standard error ( $n=2$ ).
